# Supplementary material for: Synthesis of Cu3P/SnO2 composites for degradation of tetracycline hydrochloride in wastewater
Source: RSC Adv. 2021 Nov 12;11(53):33471–80. doi: 10.1039/d1ra05905j (PMC9042268; doi:10.1039/d1ra05905j)
Supplement: RA-011-D1RA05905J-s001 [file RA-011-D1RA05905J-s001.pdf]

### Support Information :

SEM image of Cu<sub>3</sub>P and ESR/EPR figures of radicals.

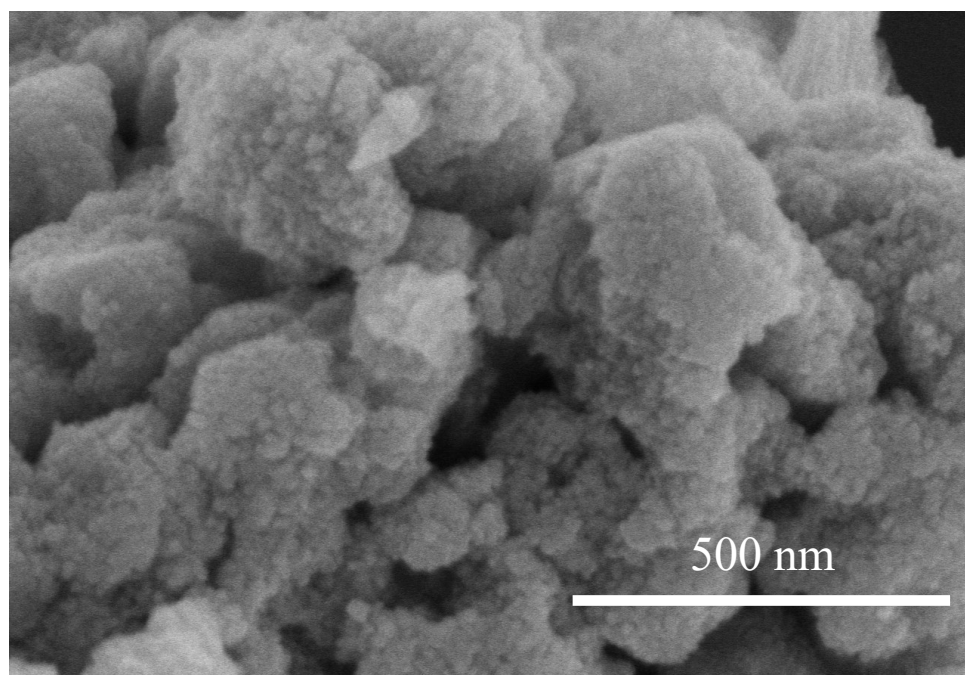

**Fig S1.** SEM images of the prepared catalysts of Cu<sub>3</sub>P

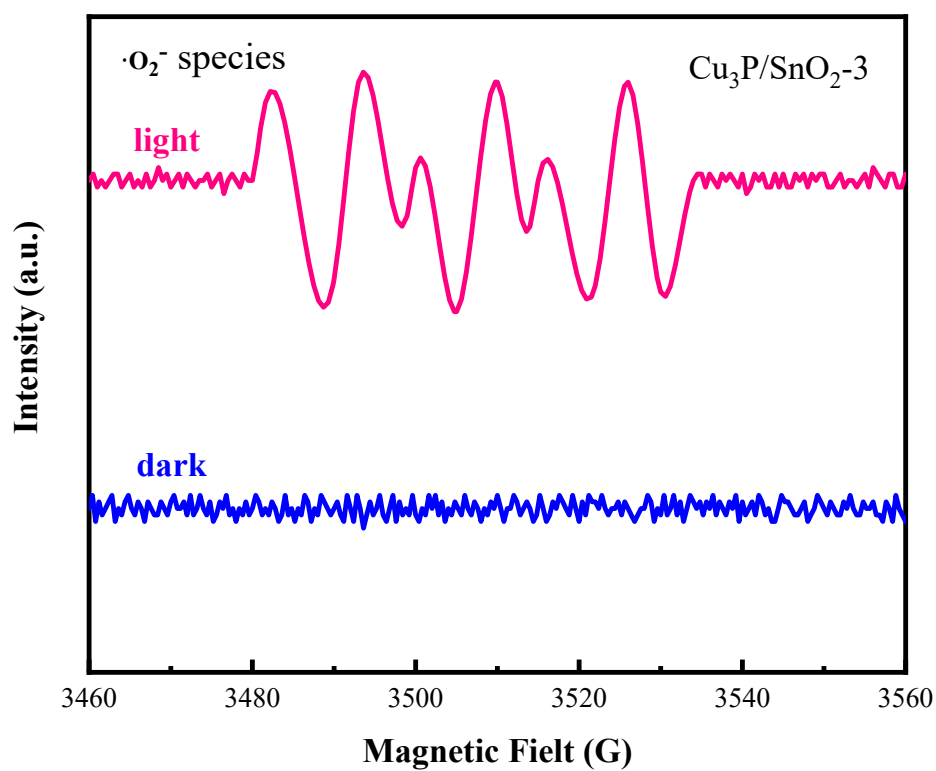

**Fig. S2** ESR tests for the  $\cdot O_2^-$  species during different catalytic processes
